# Supplementary material for: Transcriptome Expression Profiling Reveals the Molecular Response to Salt Stress in Gossypium anomalum Seedlings
Source: MDPI journal article supplement (doi:10.3390/plants13020312), 2024-01-20
Supplement: s1 [file s1]

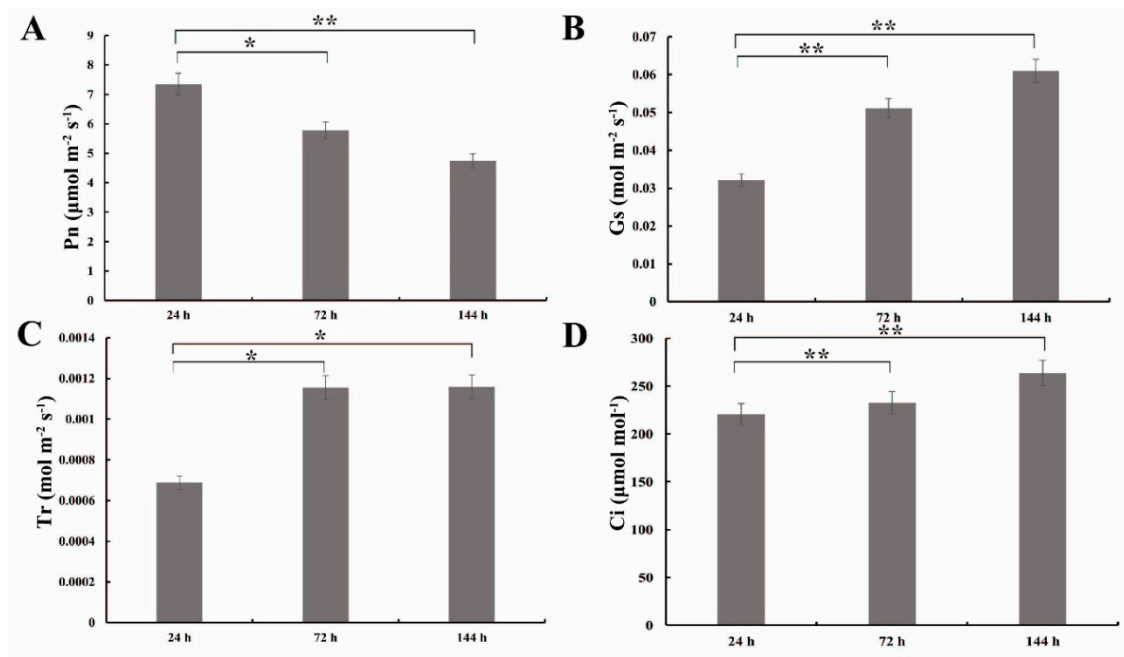

Figure S1 Photosynthetic parameters of *G.anomalum* seedlings under salt treatment. Scale bar=10cm, \* $p < 0.05$ , \*\* $p < 0.01$ , Student's t test. A, Pn: net photosynthetic rate. B, Gs: stomatal conductance. C, Tr: transpiration rate. D, Ci: intercellular CO<sub>2</sub> concentration.
